# Supplementary material for: l-Lysine-assisted fabrication of PdxPt1−x/Ni(OH)2 (0 ≤ x ≤ 1) hybrids with composition-dependent catalytic properties
Source: Royal Society of Chemistry journal article supplement (doi:10.1039/c4dt03141e), 2014-12-15
Supplement: c4dt03141e1.pdf [file c4dt03141e1.pdf]

## Supporting Information

### **L-lysine-assisted fabrication of Pd<sub>x</sub>Pt<sub>1-x</sub>/Ni(OH)<sub>2</sub> (0 ≤ x ≤ 1) hybrids with composition-dependent catalytic properties**

Jiangman Zhen,<sup>a,b</sup> Dapeng Liu,<sup>\*a</sup> Xiao Wang,<sup>a</sup> Junqi Li,<sup>a,b</sup> Fan Wang,<sup>a,b</sup> Yinghui Wang<sup>a</sup> and Hongjie Zhang<sup>\*a</sup>

*State Key Laboratory of Rare Earth Resource Utilization, Changchun Institute of Applied Chemistry, Chinese Academy of Sciences, 5625 Renmin Street, Changchun, 130022, P. R. China*

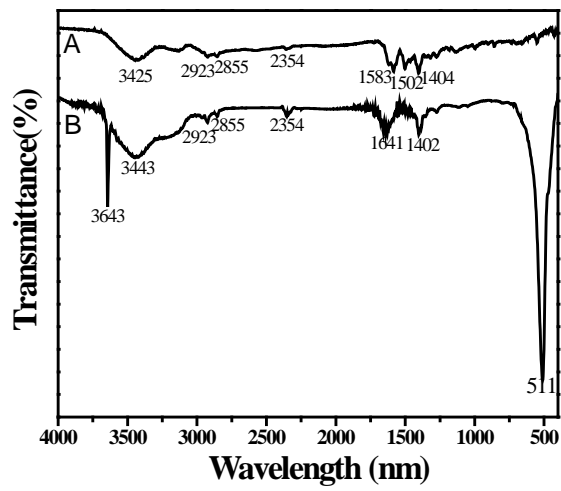

**Figure S1.** IR spectra of (A) L-lysine and (B) the as-made L-lysine modified Ni(OH)<sub>2</sub>.

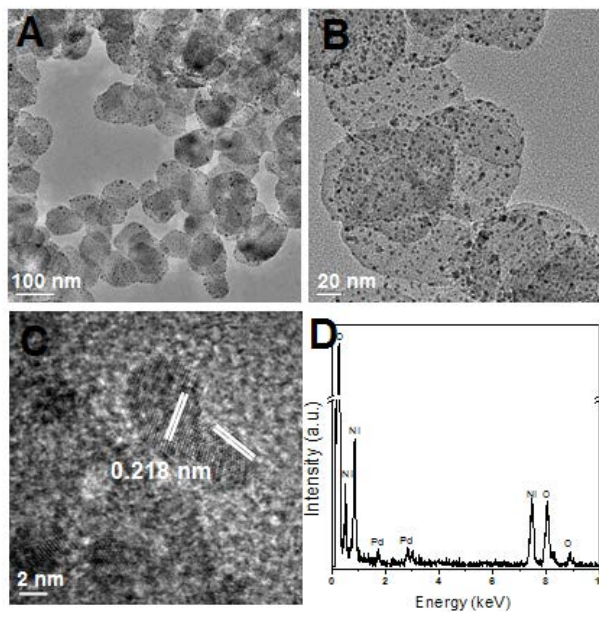

**Figure S2.** (A, B) TEM images; (C) HRTEM image; and (D) EDX analysis of Pd/Ni(OH)<sub>2</sub>.

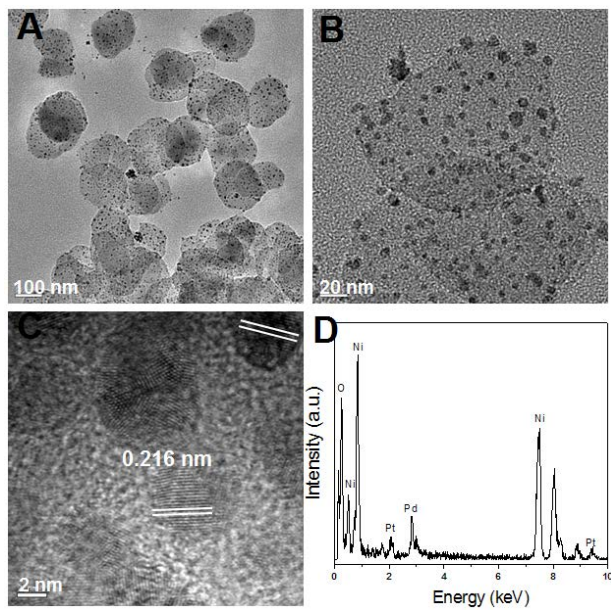

**Figure S3.** (A, B) TEM images; (C) HRTEM image; and (D) EDX analysis of  $\text{Pd}_{0.7}\text{Pt}_{0.3}/\text{Ni}(\text{OH})_2$ .

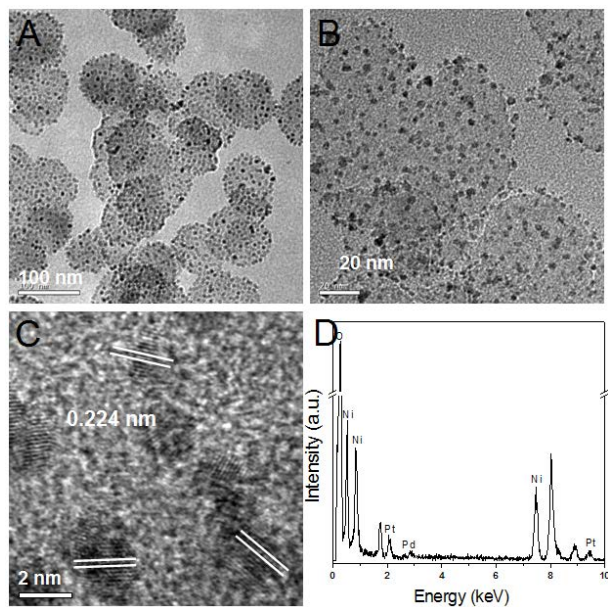

**Figure S4.** (A, B) TEM images; (C) HRTEM image; and (D) EDX analysis of  $\text{Pd}_{0.3}\text{Pt}_{0.7}/\text{Ni}(\text{OH})_2$ .

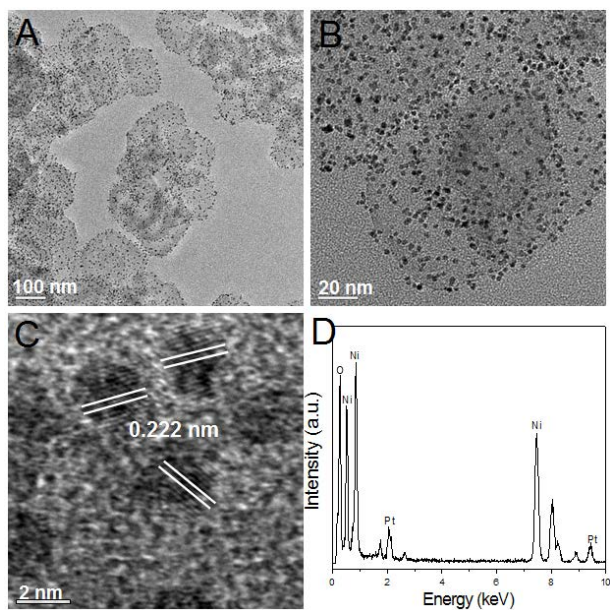

**Figure S5.** (A, B) TEM images; (C) HRTEM image; and (D) EDX analysis of Pt/Ni(OH)<sub>2</sub>.

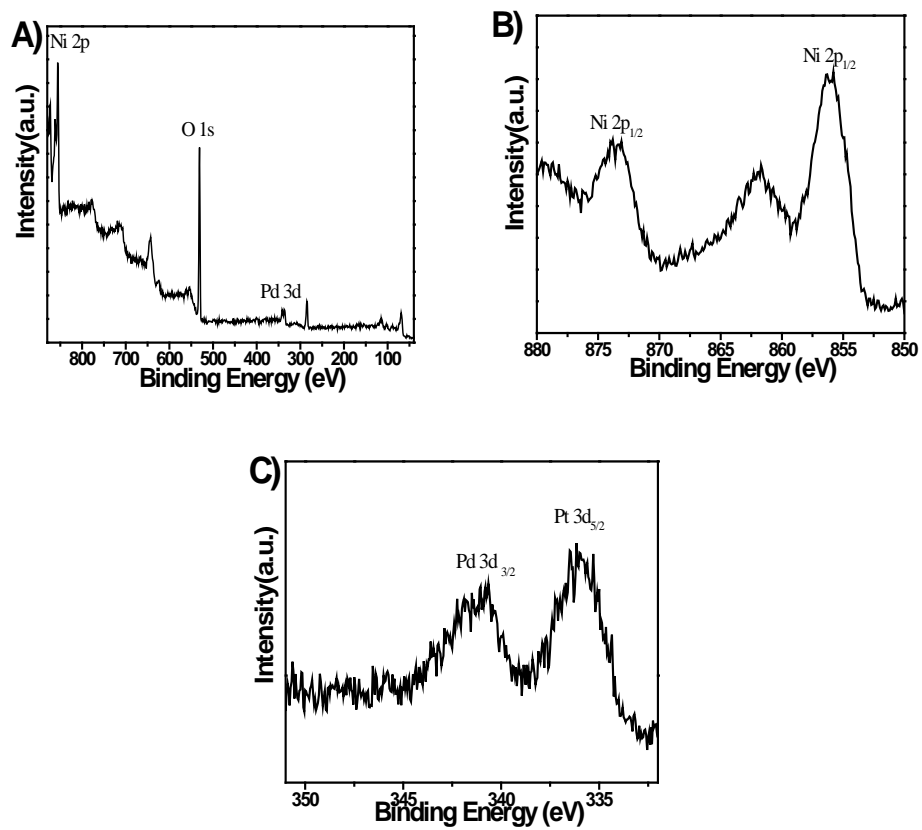

**Figure S6.** XPS analysis of Pd/Ni(OH)<sub>2</sub>.

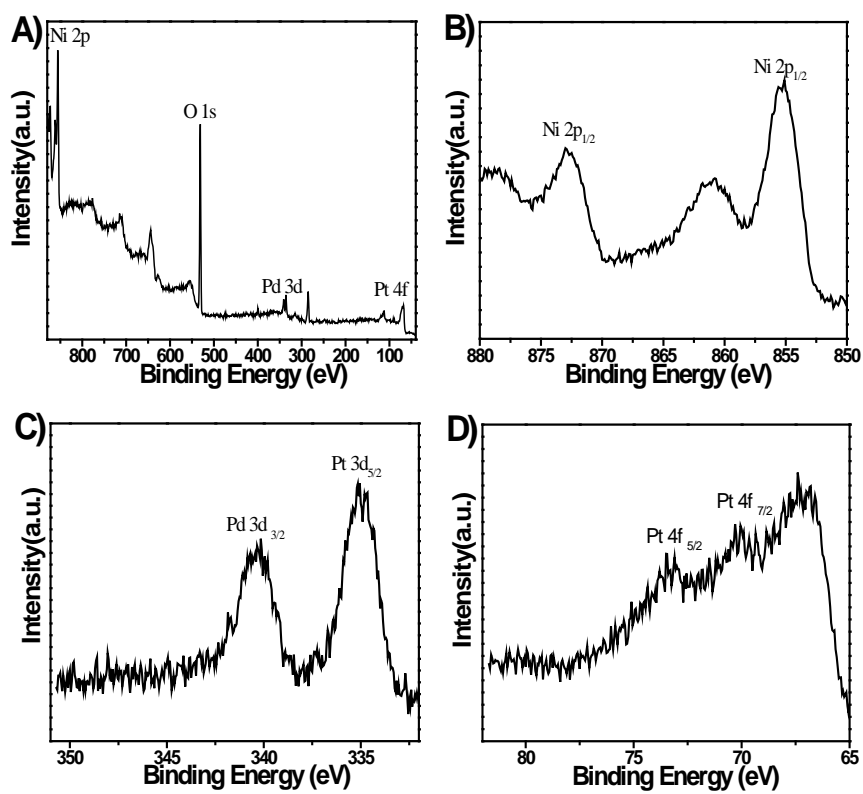

**Figure S7.** XPS analysis of  $\text{Pd}_{0.7}\text{Pt}_{0.3}/\text{Ni}(\text{OH})_2$ .



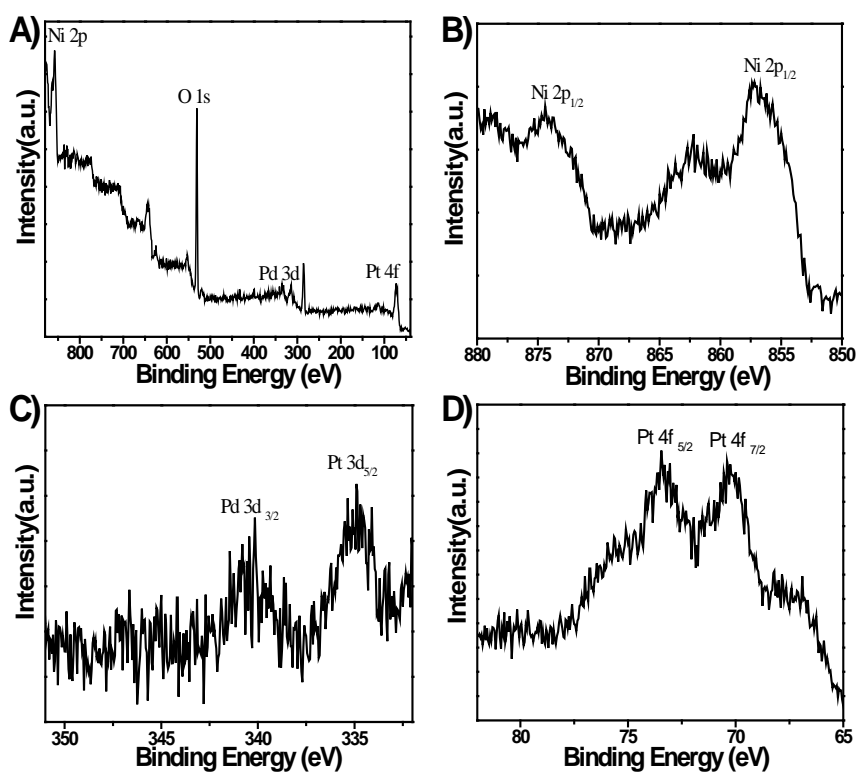

**Figure S8.** XPS analysis of Pd<sub>0.3</sub>Pt<sub>0.7</sub>/Ni(OH)<sub>2</sub>.

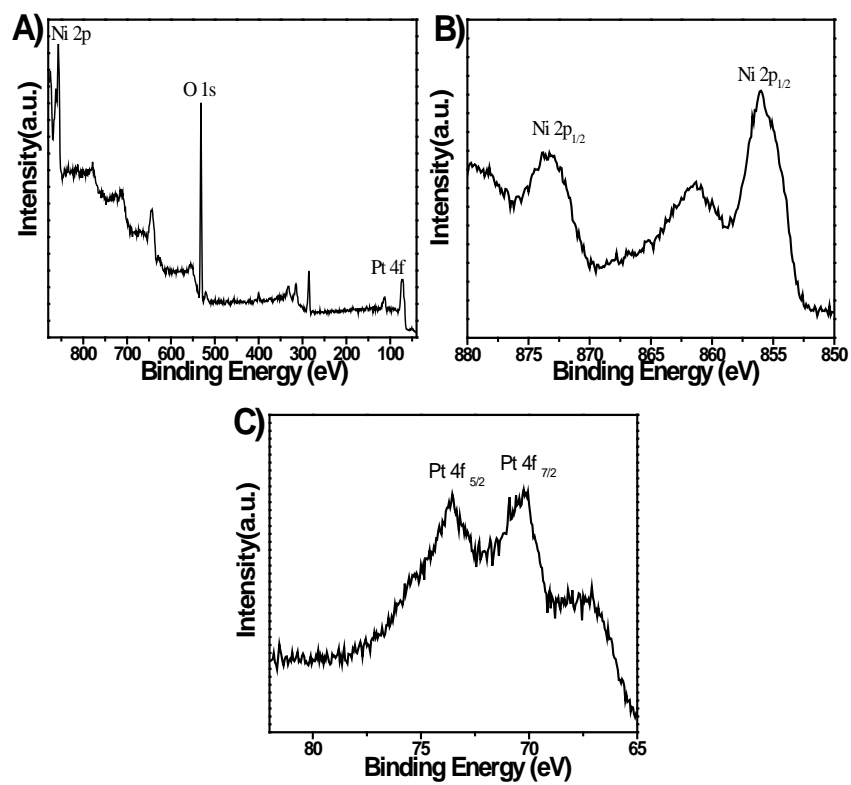

**Figure S9.** XPS analysis of Pt/Ni(OH)<sub>2</sub>.

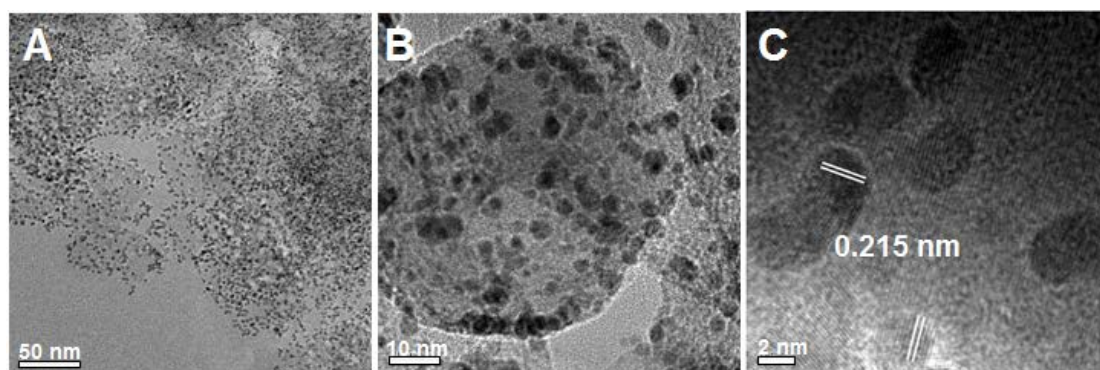

**Figure S10.** (A, B) TEM images; (C) HRTEM image of  $\text{Pd}_{0.5}\text{Pt}_{0.5}/\text{Ni}(\text{OH})_2$  after ten cycling tests.

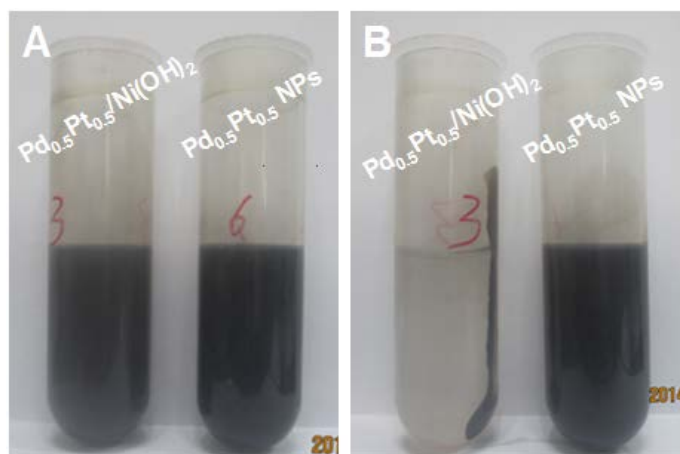

**Figure S11 S10.** Photos of the samples: (A) before and (B) after centrifugation.
